# Supplementary material for: Context-specific protection of TGFα null mice from osteoarthritis
Source: PubMed Central journal article supplement (PMC4960644; doi:10.1038/srep30434), 2016-07-26
Supplement: srep30434-s1.pdf [file srep30434-s1.pdf]

## **Supplementary Information**

### **Context-specific protection of TGF $\alpha$ null mice from osteoarthritis**

Shirine E. Usmani<sup>1</sup>, Veronica Ulici<sup>1</sup>, Michael A. Pest<sup>1</sup>, Tracy L. Hill<sup>2</sup>, Ian D. Welch<sup>2</sup>, and Frank Beier<sup>1</sup>

<sup>1</sup>Department of Physiology & Pharmacology, Schulich School of Medicine & Dentistry, The University of Western Ontario, London, ON, Canada

<sup>2</sup>Department of Animal Care and Veterinary Services, University of Western Ontario, London, Canada

Corresponding Author: Frank Beier (email: [fbeier@uwo.ca](mailto:fbeier@uwo.ca))

Key Words: transforming growth factor alpha, osteoarthritis, knockout mouse, destabilization of medial meniscus (DMM), OARSI score, histopathology

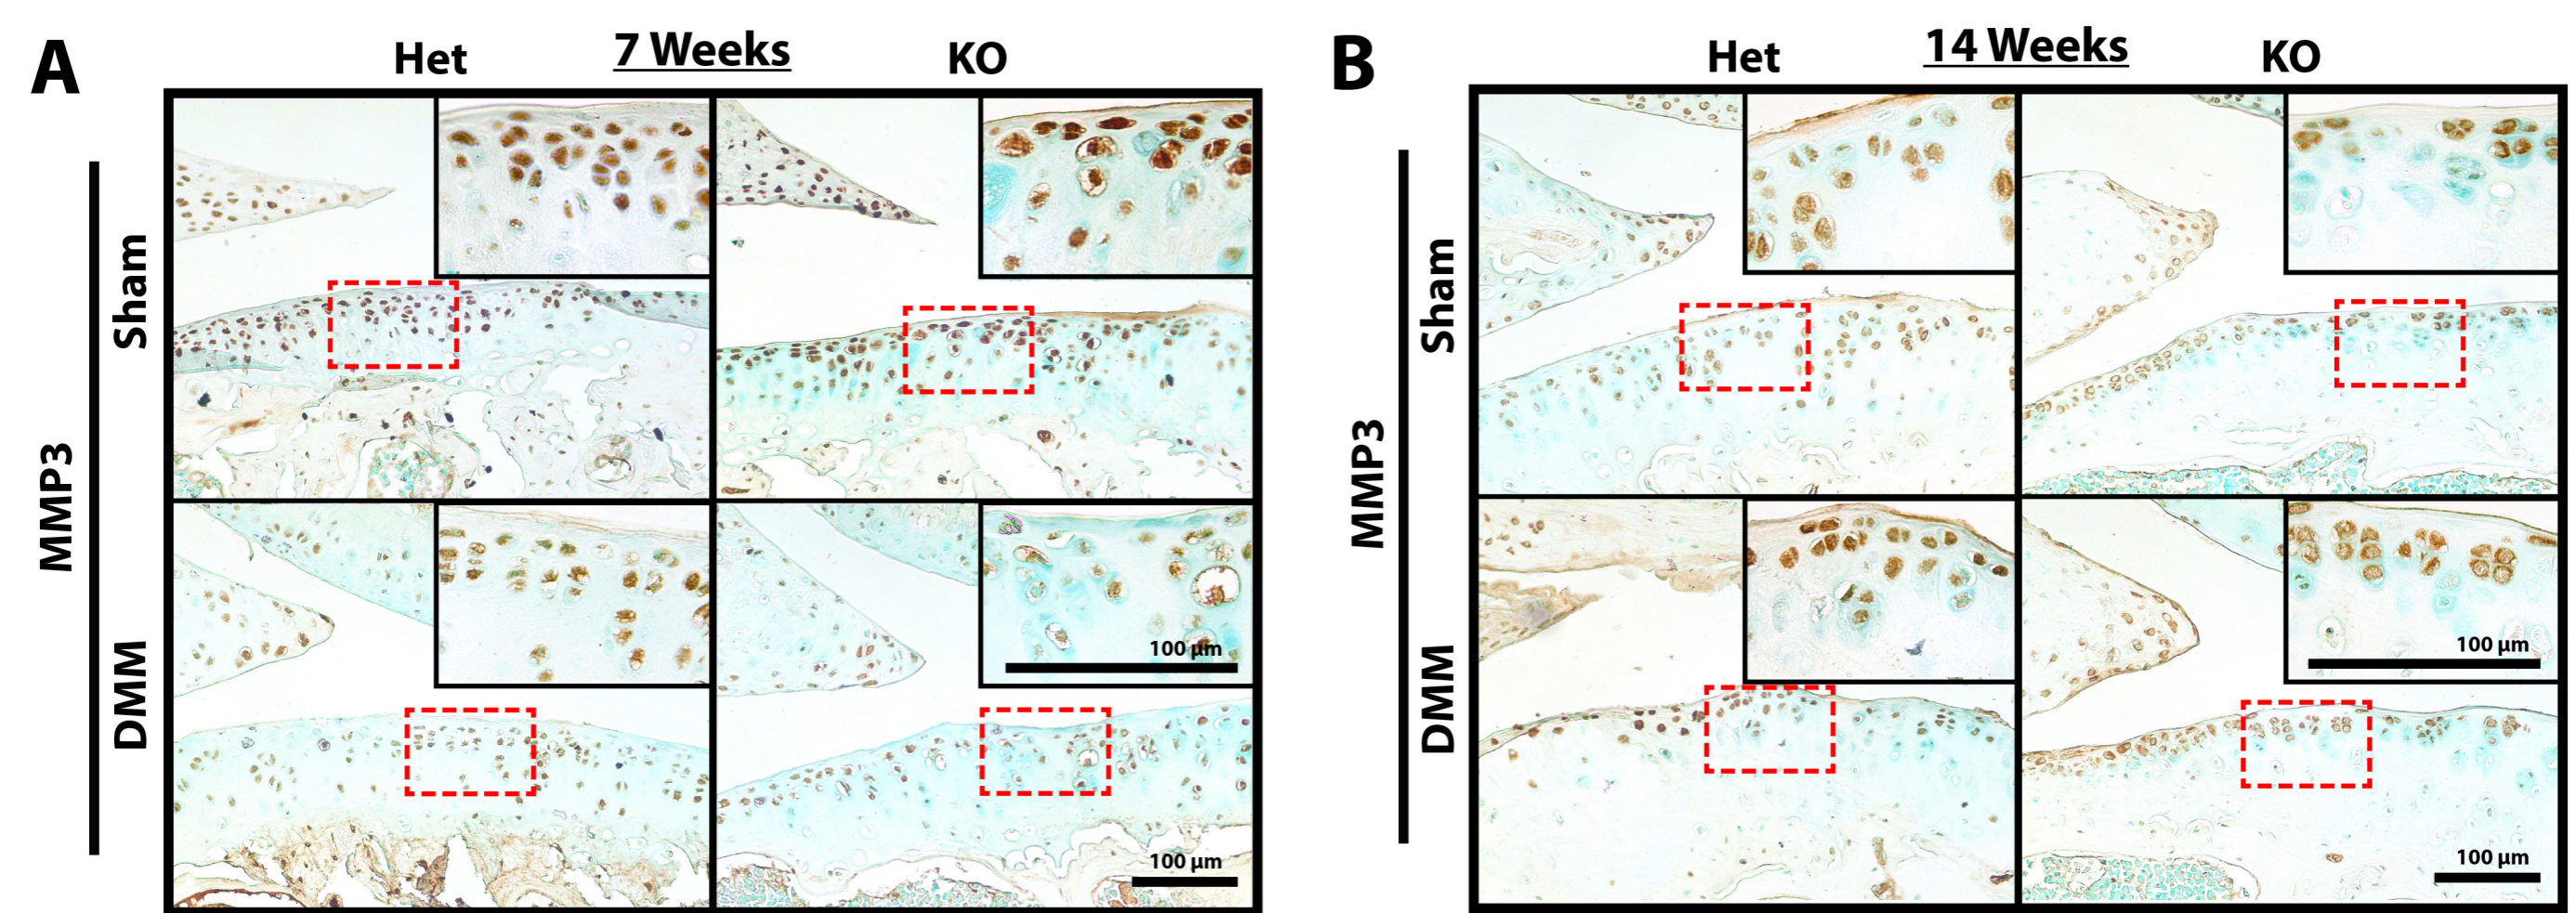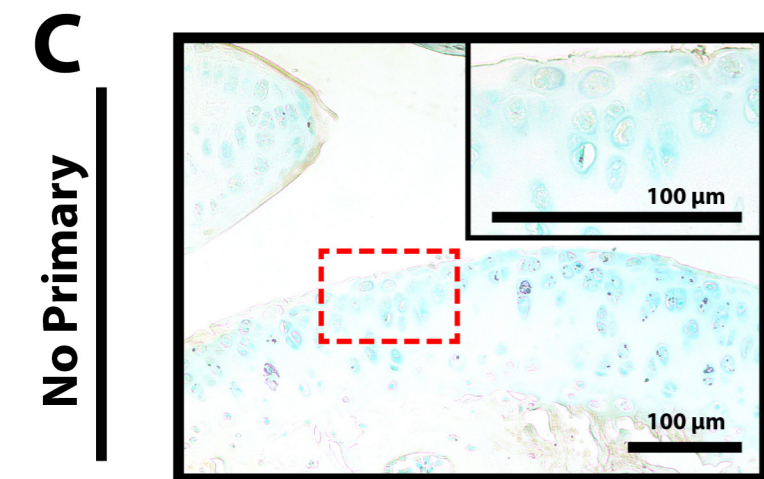

**Supplementary Figure 1. Tgfa knockout mice have similar MMP3 immunostaining when compared to heterozygous controls.** Histological sections were prepared from the knee joints of both Tgfa knockout and heterozygous mice at (A) seven and (B) fourteen weeks post-surgery. Immunohistochemistry was performed with primary antibody against matrix metalloproteinase 3 (MMP3). This was followed by secondary antibody incubation and visualization with the substrate DAB (brown). Matrix was counterstained with methyl green (blue-green). Representative images indicate that knockout animals show similar staining when compared to heterozygous controls. Inset shows red hatched box area at a higher magnification. (C) No primary controls show little background staining. Scale bars = 100  $\mu$ m. (A) n = 3 and (B) n = 5.
